# Supplementary material for: Study on Removal Mechanism for Copper Cyanide Complex Ions in Water: Ion Species Differences and Evolution Process
Source: MDPI journal article supplement (doi:10.3390/ijms24065066), 2023-03-07
Supplement: s1 [file s1]

**Table S1.** Optimized bond length of  $\text{Cu}(\text{CN})_2^-$ ,  $\text{Cu}(\text{CN})_3^{2-}$ ,  $\text{Cu}(\text{CN})_4^{3-}$  in Cu and CN

| Ion                           | Ions-CN-1 | Ions-CN-2 | Ions-CN-3 | Ions-CN-4 | Ions-<br>Charge<br>(opt) | Ions-<br>Charge (sp) |
|-------------------------------|-----------|-----------|-----------|-----------|--------------------------|----------------------|
| $\text{Cu}(\text{CN})_2^-$    | 1.87194   | 1.87191   |           |           | -0.135                   | 0.326                |
| $\text{Cu}(\text{CN})_3^{2-}$ | 1.94263   | 1.94263   | 1.94445   |           | -0.537                   | 0.363                |
| $\text{Cu}(\text{CN})_4^{3-}$ | 1.99468   | 1.99654   | 1.9947    | 1.9971    | -1.02                    | 0.331                |

**Table S2.** Thermodynamic data of  $\text{Cu}(\text{CN})_2^-$ ,  $\text{Cu}(\text{CN})_3^{2-}$ ,  $\text{Cu}(\text{CN})_4^{3-}$ 

| Ion                           | E/a.u.   | U/a.u.   | H/a.u.   | G/a.u.   | $\Delta\text{U}/\text{kJ/mol}$ | $\Delta\text{H}/\text{kJ/mol}$ |
|-------------------------------|----------|----------|----------|----------|--------------------------------|--------------------------------|
| $\text{Cu}(\text{CN})_2^-$    | -1826.38 | -1826.36 | -1826.35 | 1826.38  | 54.092                         | 56.571                         |
| $\text{Cu}(\text{CN})_3^{2-}$ | -1919.35 | -1919.32 | -1919.32 | -1919.36 | 79.618                         | 82.097                         |
| $\text{Cu}(\text{CN})_4^{3-}$ | -2012.31 | -2012.27 | -2012.17 | -2012.32 | 105.497                        | 105.976                        |

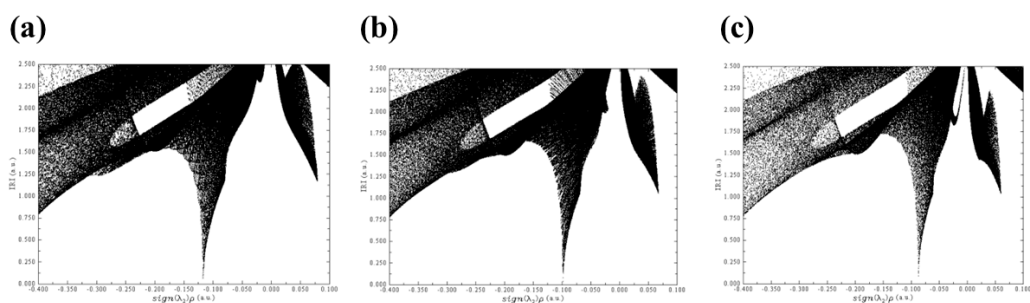**Figure S1.** (a) $\text{Cu}(\text{CN})_2^-$ , (b) $\text{Cu}(\text{CN})_3^{2-}$ , (c) $\text{Cu}(\text{CN})_4^{3-}$  original scatter plot after IRI analysis**Table S3.** Response surface test factor level and coding

| coding | pH | Temperature           | $\text{cCu}:\text{cCN}$ |
|--------|----|-----------------------|-------------------------|
|        | A  | B/ $^{\circ}\text{C}$ | C                       |
| -1     | 7  | 25                    | 0.01                    |
| 0      | 9  | 30                    | 0.055                   |
| 1      | 11 | 35                    | 0.1                     |

**Table S4.** Experimental design and results

| Serial number | pH | Temperature | $c_{Cu} : c_{CN}$ | $Cu(CN)_4^{3-}$         |
|---------------|----|-------------|-------------------|-------------------------|
|               | A  | B/°C        | C                 | Y/ (*10 <sup>-4</sup> ) |
| 1             | 1  | 0           | 1                 | 35.25034                |
| 2             | 0  | -1          | 1                 | 51.0261                 |
| 3             | 0  | 0           | 0                 | 74.0659                 |
| 4             | 0  | 0           | 0                 | 68.2635                 |
| 5             | -1 | 0           | 1                 | 16.09322                |
| 6             | 1  | 1           | 0                 | 9.17344                 |
| 7             | -1 | -1          | 0                 | 8.45619                 |
| 8             | 1  | -1          | 0                 | 38.6135                 |
| 9             | 0  | -1          | -1                | 8.70559                 |
| 10            | 1  | 0           | -1                | 2.3347                  |
| 11            | 0  | 0           | 0                 | 82.7417                 |
| 12            | 0  | 0           | 0                 | 78.1377                 |
| 13            | -1 | 1           | 0                 | 28.9742                 |
| 14            | -1 | 0           | -1                | 21.9742                 |
| 15            | 0  | 1           | 1                 | 49.9742                 |
| 16            | 0  | 1           | -1                | 21.9742                 |
| 17            | 0  | 0           | 0                 | 74.9742                 |

**Table S5.** Results of variance analysis of  $Cu(CN)_4^{3-}$  regression equation

| Source of variance | Sum of squares | Degree  |          | F value | P value | significance |
|--------------------|----------------|---------|----------|---------|---------|--------------|
|                    |                | of      | variance |         |         |              |
|                    |                | freedom |          |         |         |              |
| Regression model   | 11971.84       | 9       | 1330.20  | 22.24   | 0.0002  | **           |
| A                  | 12.19          | 1       | 12.19    | 0.20    | 0.6654  |              |
| B                  | 1.36           | 1       | 1.36     | 0.023   | 0.8845  |              |

---

|                 |          |    |         |       |          |    |
|-----------------|----------|----|---------|-------|----------|----|
| C               | 1184.75  | 1  | 1184.75 | 19.80 | 0.0030   | ** |
| AB              | 623.95   | 1  | 623.95  | 10.43 | 0.0145   | *  |
| AC              | 376.29   | 1  | 376.29  | 6.29  | 0.0405   | *  |
| BC              | 51.27    | 1  | 51.27   | 0.86  | 0.3854   |    |
| A <sup>2</sup>  | 4916.05  | 1  | 4916.05 | 82.18 | < 0.0001 | ** |
| B <sup>2</sup>  | 1711.72  | 1  | 1711.72 | 28.61 | 0.0011   | ** |
| C <sup>2</sup>  | 2141.80  | 1  | 2141.80 | 35.80 | 0.0006   | ** |
| Residual error  | 418.76   | 7  | 59.82   |       |          |    |
| Disfitting term | 304.75   | 3  | 101.58  | 3.56  | 0.1256   |    |
| Pure error      | 114.01   | 4  | 28.50   |       |          |    |
| total           | 12390.60 | 16 |         |       |          |    |

---
